# Supplementary material for: Microsomal Prostaglandin E Synthase-1 Facilitates an Intercellular Interaction between CD4+ T Cells through IL-1β Autocrine Function in Experimental Autoimmune Encephalomyelitis
Source: MDPI journal article supplement (doi:10.3390/ijms18122758), 2017-12-19
Supplement: s1 [file s1]

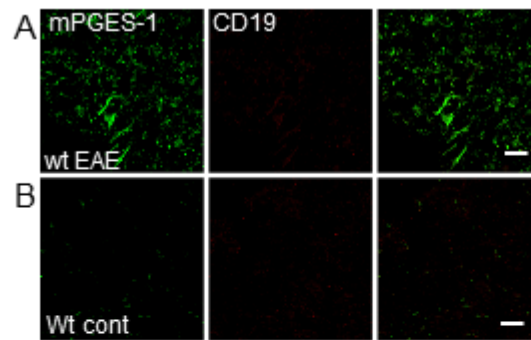

**Supplementary Figure 1.**

Immunohistochemistry image of microsomal PGE<sub>2</sub> synthase-1 (mPGES -1) (green) with CD19 (red) in the inflammatory region of spinal cords of EAE wild-type (wt) mice (A) and control wt mice (B). Scale bars (20 μm) for all images.

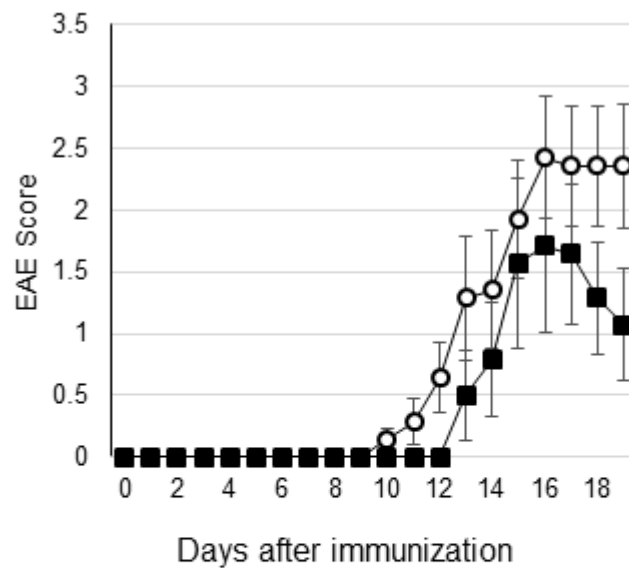

**Supplementary Figure 2.**

EAE development in wt and *mPGES-1*-deficient (*mPGES-1*<sup>-/-</sup>) mice. The EAE score gradually increased and maintained a high level in wt mice (open circle) but promptly decreased in *mPGES-1*<sup>-/-</sup> mice (closed square).

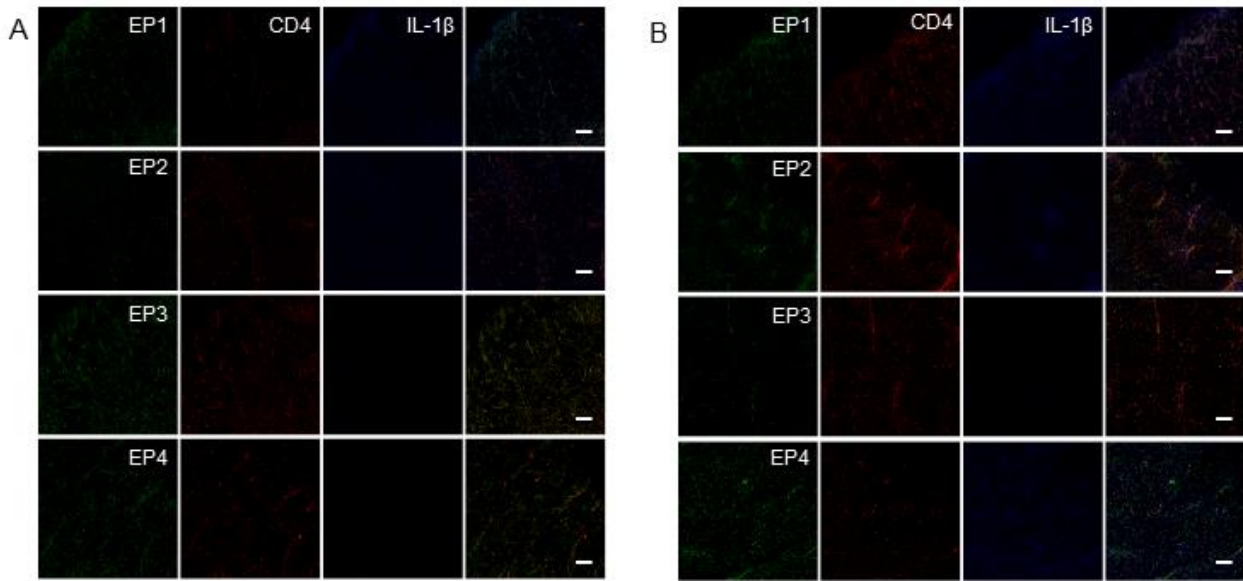

**Supplementary Figure 3.**

Expression of EP receptors and IL-1 $\beta$  in CD4<sup>+</sup> T cells in the control spinal cord. Immunohistochemistry image showing EP 1-4 (green), CD4 (red) and IL-1 $\beta$  (blue) in the spinal cords of control wt mice (A) and control *mPGES-1*<sup>-/-</sup> mice (B). Scale bar (50  $\mu$ m) for all images.

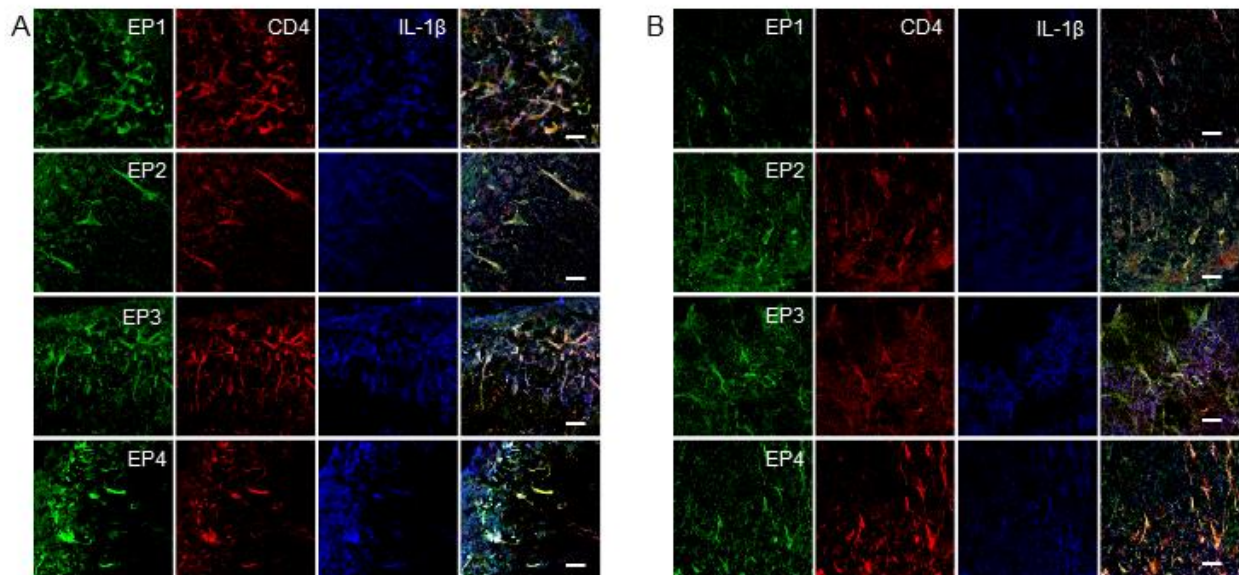

**Supplementary Figure 4.**

Expression of EP receptors and IL-1 $\beta$  in CD4<sup>+</sup> T cells in the EAE spinal cord. Immunohistochemistry image showing EP 1-4 (green), CD4 (red) and IL-1 $\beta$  (blue) in the inflammatory region of spinal cords of EAE wt mice (A) and EAE *mPGES-1*<sup>-/-</sup> mice (B). Scale bar (20  $\mu$ m) for all images.
